# Supplementary material for: Ultrastable hydrated vanadium dioxide cathodes for high-performance aqueous zinc ion batteries with H+/Zn2+ Co-insertion mechanism
Source: Royal Society of Chemistry journal article supplement (doi:10.1039/d2ta07101k), 2022-01-01
Supplement: d2ta07101k1.pdf [file d2ta07101k1.pdf]

# Supporting Information

## Ultrastable Hydrated Vanadium Dioxide Cathodes for High-Performance Aqueous Zinc Ion Batteries with H<sup>+</sup>/Zn<sup>2+</sup> Co-insertion Mechanism

Xiudong Chen,<sup>a,b,†,\*</sup> Xiesen Hu,<sup>b,‡</sup> Yaoyao Chen,<sup>b</sup> Xiaohua Cao,<sup>a,\*</sup> Yan Huang,<sup>b,\*</sup> Hang Zhang,<sup>c</sup> Jin-Hang Liu,<sup>a</sup> Yawei Wang,<sup>a</sup> Shu-Lei Chou,<sup>c,\*</sup> and Dapeng Cao<sup>b,\*</sup>

<sup>a</sup> School of Chemistry and Chemical Engineering, Jiangxi Province Engineering Research Center of Ecological Chemical Industry, Jiujiang University, Jiujiang 332005, China

E-mail: [chenxd@jju.edu.cn](mailto:chenxd@jju.edu.cn), [caojimmy@126.com](mailto:caojimmy@126.com)

<sup>b</sup> State Key Laboratory of Organic-Inorganic Composites, Beijing University of Chemical Technology, Beijing 100029, China

E-mail: [huangyan@mail.buct.edu.cn](mailto:huangyan@mail.buct.edu.cn), [caodp@mail.buct.edu.cn](mailto:caodp@mail.buct.edu.cn)

<sup>c</sup> Institute of Carbon Neutralization College of Chemistry and Materials Engineering, Wenzhou University, Wenzhou 325035, China

E-mail: [chou@wzu.edu.cn](mailto:chou@wzu.edu.cn)

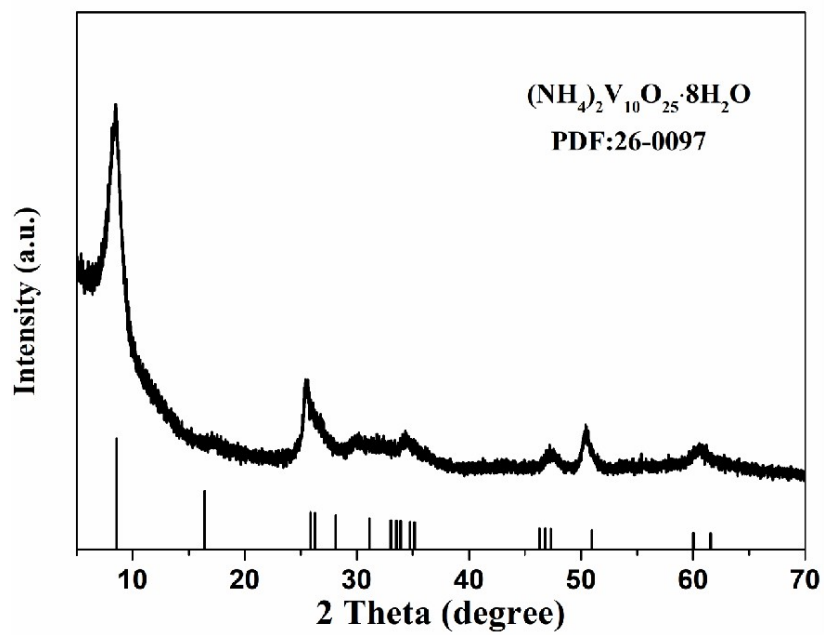

Fig. S1 XRD pattern of  $(\text{NH}_4)_2\text{V}_{10}\text{O}_{25}\cdot 8\text{H}_2\text{O}$ .

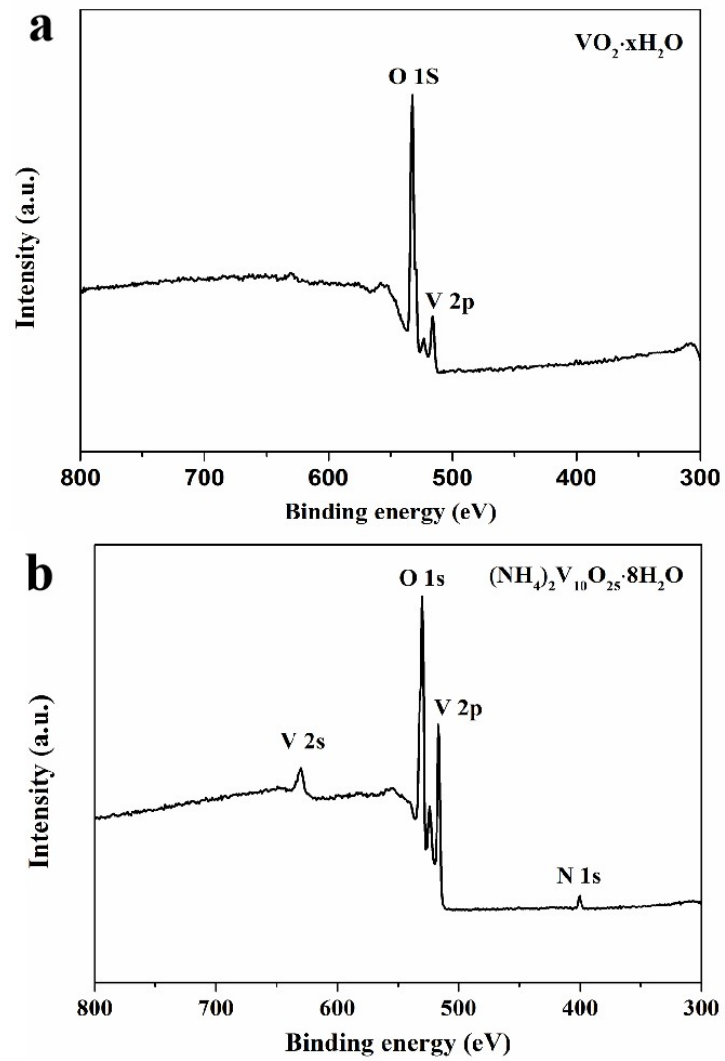

Fig. S2 XPS full spectra of a)  $\text{VO}_2 \cdot x\text{H}_2\text{O}$  and b)  $(\text{NH}_4)_2\text{V}_{10}\text{O}_{25} \cdot 8\text{H}_2\text{O}$ .

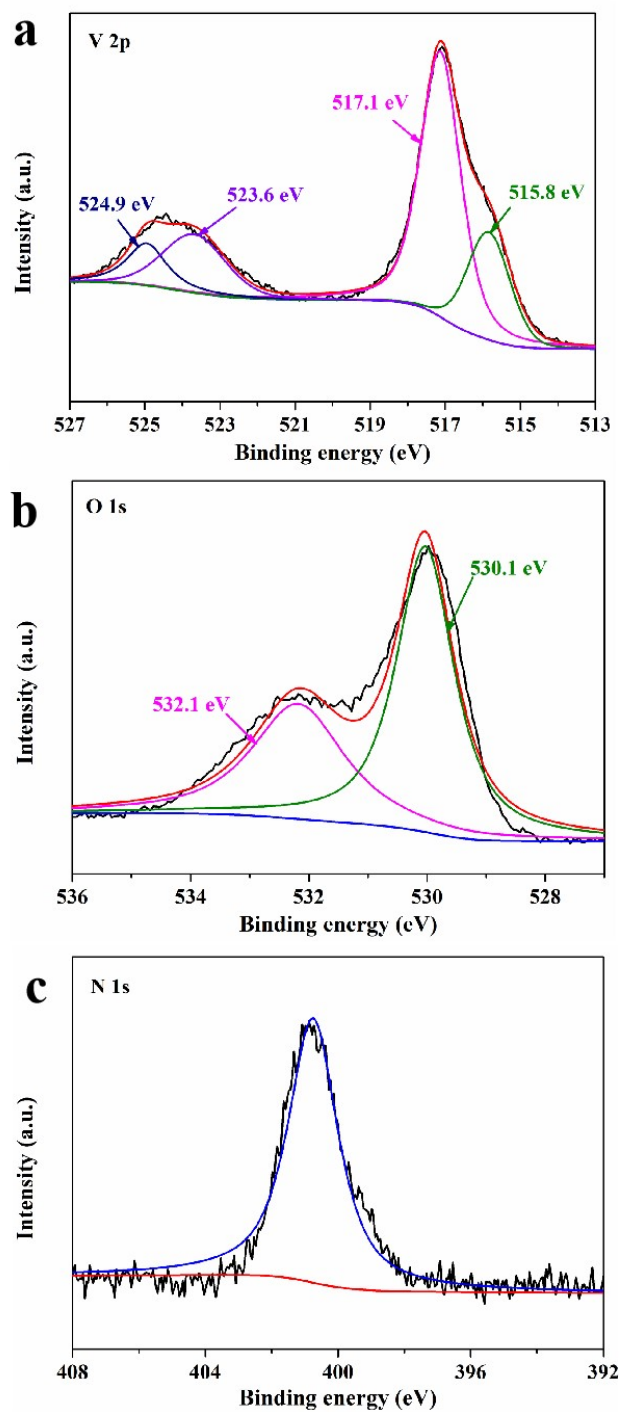

**Fig. S3** XPS spectrum of the  $(\text{NH}_4)_2\text{V}_{10}\text{O}_{25}\cdot 8\text{H}_2\text{O}$  corresponding high resolution XPS spectra of a) V 2p, b) O 1s, and c) N 1s.

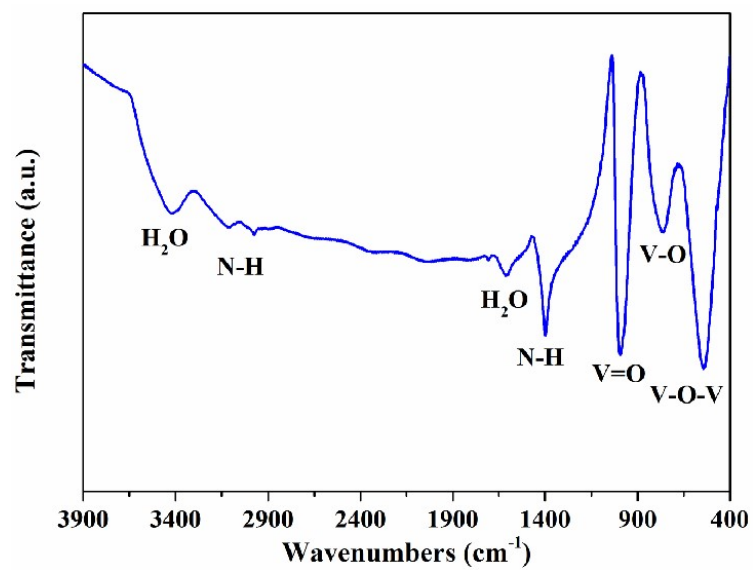

**Fig. S4** FTIR spectrum of the  $(\text{NH}_4)_2\text{V}_{10}\text{O}_{25}\cdot 8\text{H}_2\text{O}$ .

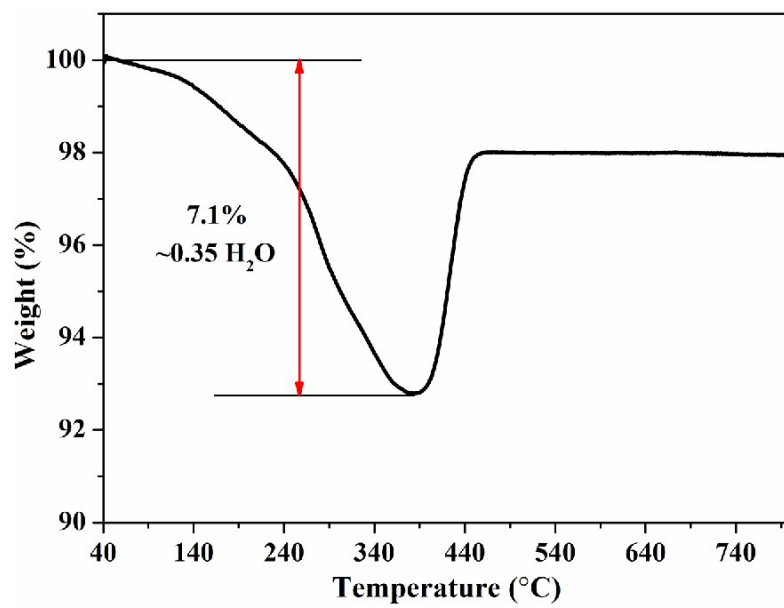

Fig. S5 TGA curve of the  $\text{VO}_2 \cdot x\text{H}_2\text{O}$  under  $\text{O}_2$  atmosphere.

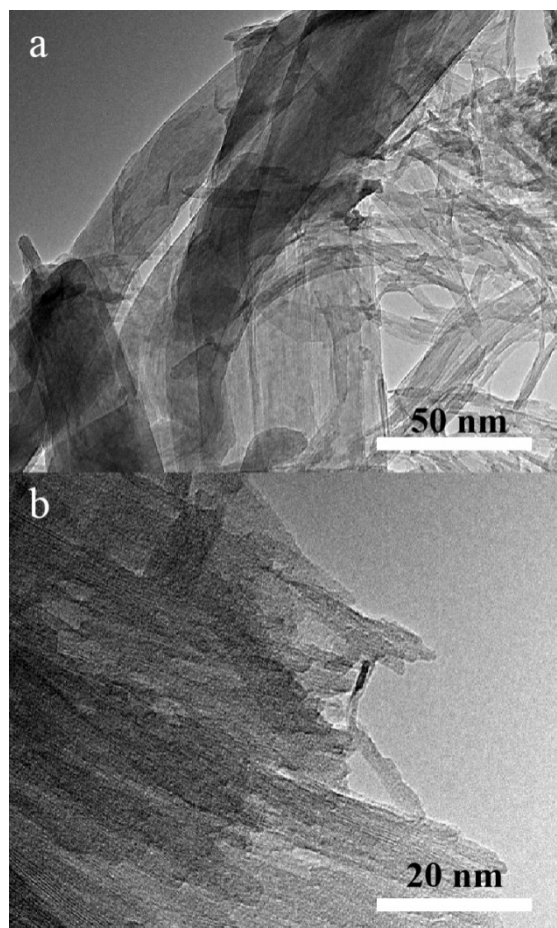

**Fig. S6** HRTEM images of the  $(\text{NH}_4)_2\text{V}_{10}\text{O}_{25}\cdot 8\text{H}_2\text{O}$

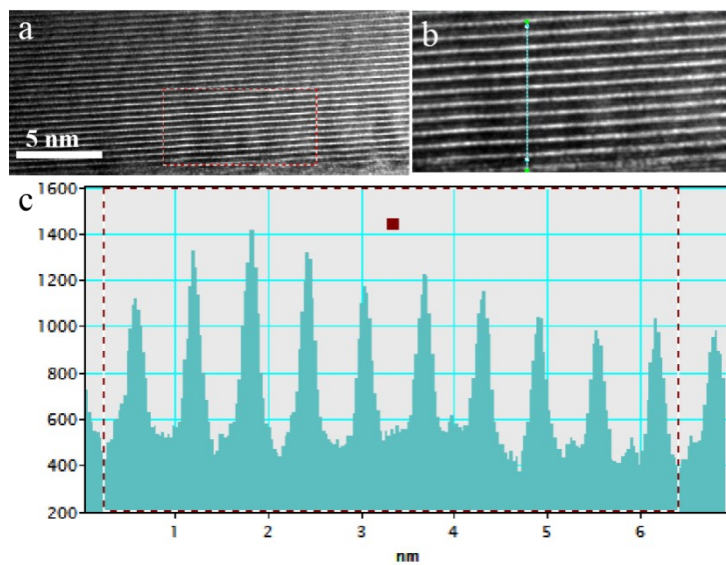

**Fig. S7** The lattice spacing determination of  $\text{VO}_2 \cdot x\text{H}_2\text{O}$ : a) HRTEM image, b) lattice fringes of HRTEM image, c) the lattice spacing ( $\sim 0.62\text{nm}$ ) of ten lattice fringes. In order to calculate the change of  $d$  value during cycling, ten lattice fringes were measured.



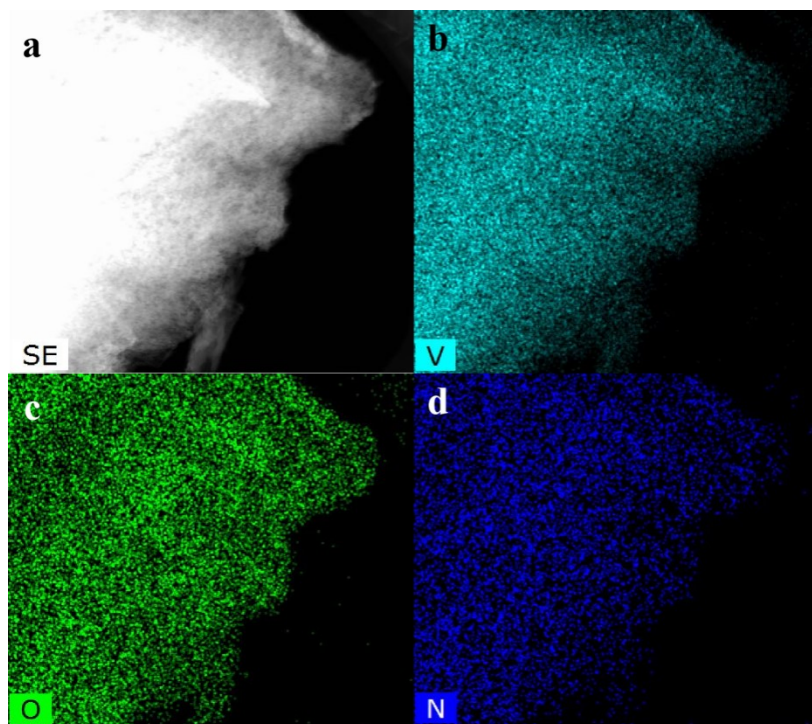

**Fig. S8** HAADF-STEM images with EDS mapping of the  $(\text{NH}_4)_2\text{V}_{10}\text{O}_{25}\cdot 8\text{H}_2\text{O}$ .

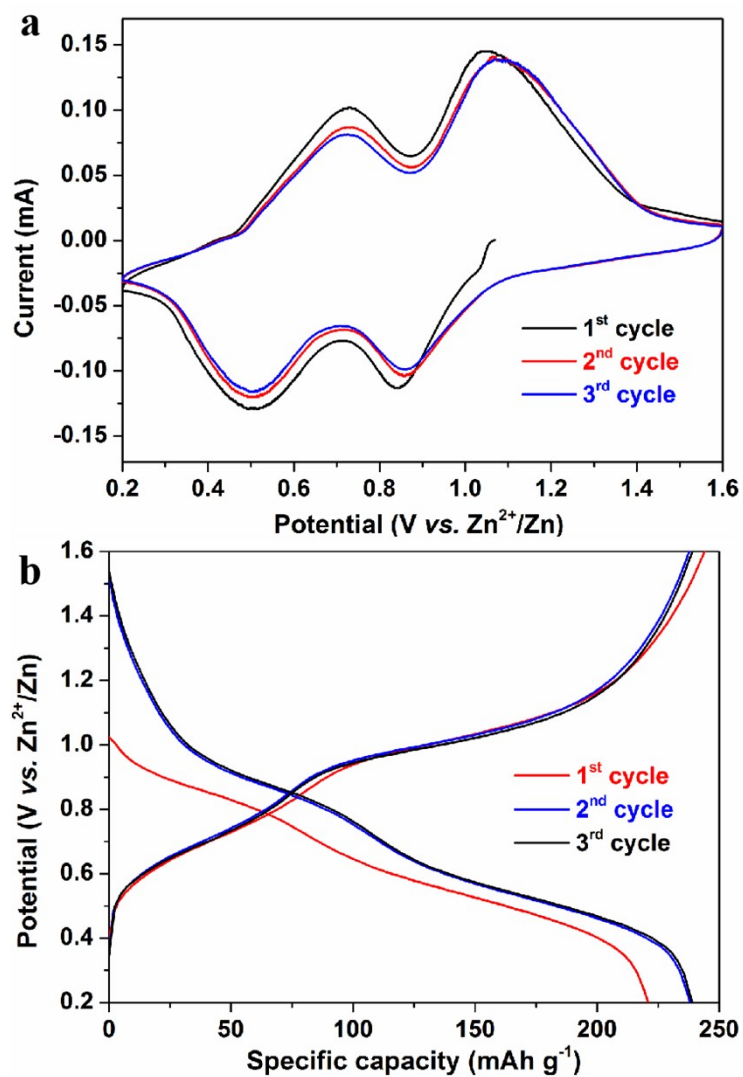

**Fig. S9** a) The CV curves of  $(\text{NH}_4)_2\text{V}_{10}\text{O}_{25}\cdot 8\text{H}_2\text{O}$  at  $0.1 \text{ mV s}^{-1}$ . b) Charge- discharge curves of  $(\text{NH}_4)_2\text{V}_{10}\text{O}_{25}\cdot 8\text{H}_2\text{O}$  for the first three cycle at  $1 \text{ A g}^{-1}$ .

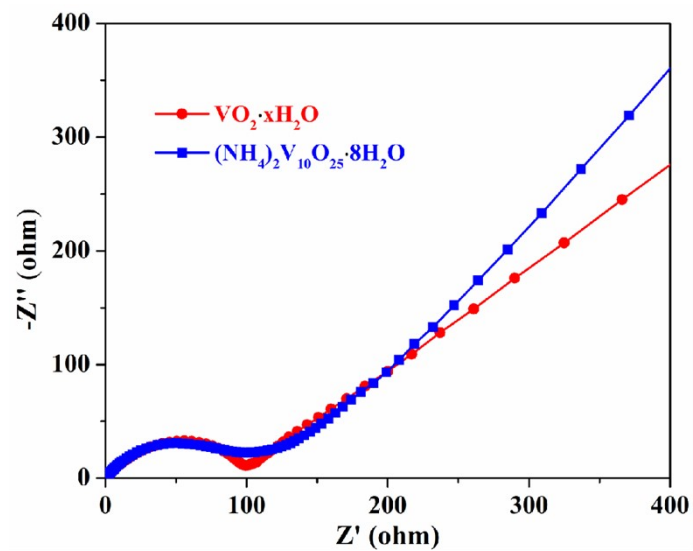

**Fig. S10** The Nyquist plots for VO<sub>2</sub>·xH<sub>2</sub>O and (NH<sub>4</sub>)<sub>2</sub>V<sub>10</sub>O<sub>25</sub>·8H<sub>2</sub>O cathode after the first cycles

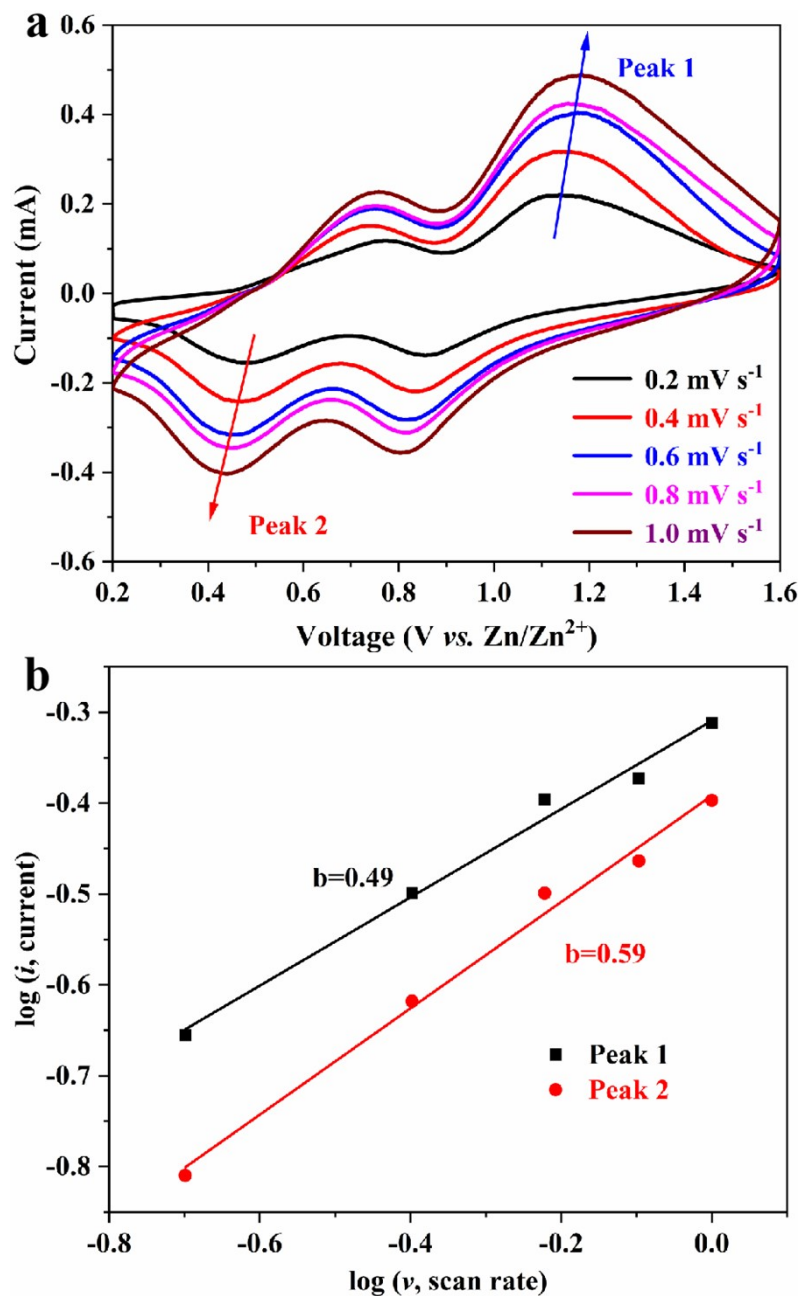

**Fig. S11** a) CV curves of  $(\text{NH}_4)_2\text{V}_{10}\text{O}_{25}\cdot 8\text{H}_2\text{O}$  in 2 M  $\text{Zn}(\text{CF}_3\text{SO}_3)_2$  electrolyte at various scan rates from 0.2 to 1.0  $\text{mV s}^{-1}$ . b)  $\log(i)$  versus  $\log(v)$  curves of cathodic and anodic peak.

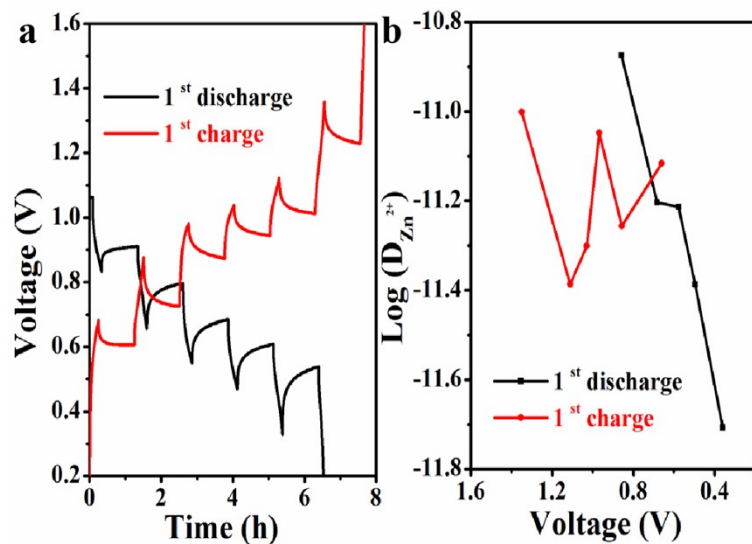

**Fig. S12** a) Discharge and charge GITT profile of  $(\text{NH}_4)_2\text{V}_{10}\text{O}_{25}\cdot 8\text{H}_2\text{O}$  for the first cycle. b) Diffusivity coefficient at different discharge and charge states during GITT measurement.

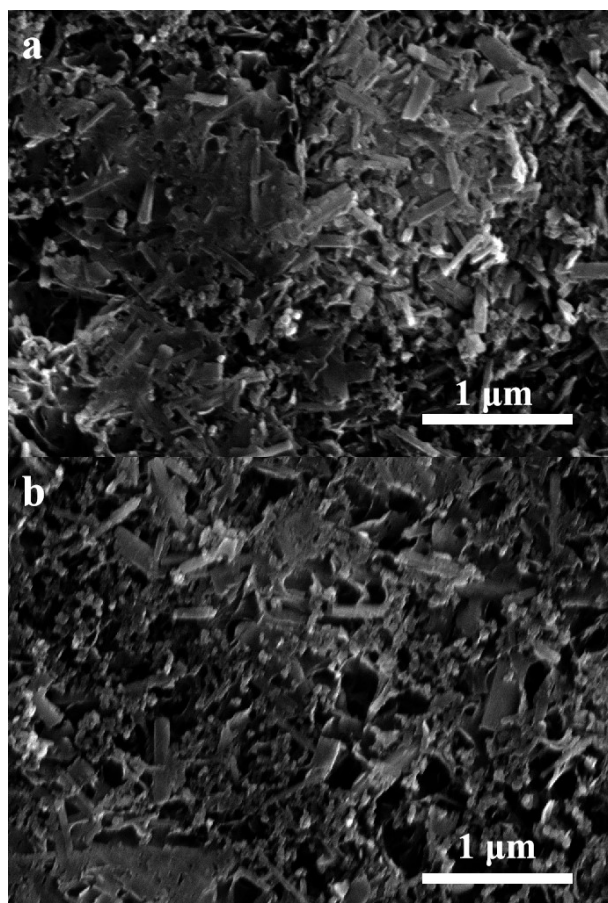

**Fig. S13** FESEM images of the holey  $\text{VO}_2 \cdot x\text{H}_2\text{O}$  electrode at various cycled states: a) fully discharged to 0.2 V and b) fully charged to 1.6 V in the first cycle.

**Table S1.** Detailed structural information on the VO<sub>2</sub>·xH<sub>2</sub>O sample after Rietveld refinement.

Monoclinic, space group *C2/m(12)*,  $a=6.296112$  Å,  $b=6.297671$  Å,  $c=6.427364$  Å,  
 $\alpha=73.845^\circ$ ,  $\beta=73.817^\circ$ ,  $\gamma=34.114^\circ$ ,  $V=136.732$  Å<sup>3</sup>,  $R_{wp}=5.25\%$ ,  $R_p=3.97\%$ .

| atom | x       | y       | z       | Occ. | U    |
|------|---------|---------|---------|------|------|
| V0   | 0.29822 | 0.30782 | 0.26806 | 1    | 0.01 |
| V1   | 0.69665 | 0.69507 | 0.72462 | 1    | 0.01 |
| V2   | 0.3988  | 0.3988  | 0.68529 | 1    | 0.01 |
| V3   | 0.6012  | 0.6012  | 0.31471 | 1    | 0.01 |
| O4   | 0.33141 | 0.39982 | 0.00623 | 1    | 0.01 |
| O5   | 0.64554 | 0.63362 | 0.99449 | 1    | 0.01 |
| O6   | 0.23787 | 0.23787 | 0.64901 | 1    | 0.01 |
| O7   | 0.76213 | 0.76213 | 0.35099 | 1    | 0.01 |
| O8   | 0.46035 | 0.46558 | 0.30358 | 1    | 0.01 |
| O9   | 0.55199 | 0.57209 | 0.63651 | 1    | 0.01 |
| O10  | 0.14904 | 0.09801 | 0.29463 | 1    | 0.01 |
| O11  | 0.86531 | 0.86531 | 0.70082 | 1    | 0.01 |

**Table S2.** Electrochemical properties compared between  $\text{VO}_2 \cdot x\text{H}_2\text{O}$  and previously reported  $\text{VO}_2$  materials (IRC: initial reversible capacity,  $\text{mAh g}^{-1}$ ; RRC: retained reversible capacity,  $\text{mAh g}^{-1}$ ; CN: cycle number; CD: current density,  $\text{A g}^{-1}$ ).

| Composite                                  | IRC   | RRC   | CN  | CD    | Reference |
|--------------------------------------------|-------|-------|-----|-------|-----------|
| $\text{VO}_2 \cdot x\text{H}_2\text{O}$    | 302   | 376   | 1   | 200   | This work |
|                                            | 283   | 289   | 5   | 2000  |           |
|                                            | 197   | 206   | 15  | 8000  |           |
| holey C@ $\text{VO}_2$                     | 386.9 | 345.8 | 0.2 | 100   | 1         |
|                                            | 332   | 280   | 5   | 600   |           |
| RGO/ $\text{VO}_2$                         | 242   | 240   | 1   | 1000  | 2         |
| $\text{VO}_2(\text{B})/\text{RGO}$         | ~240  | 216   | 5   | 1600  | 3         |
| $\text{VO}_2$                              | ~160  | ~220  | 0.5 | 350   | 4         |
|                                            | ~105  | ~100  | 5   | 10000 |           |
| nsutite-type $\text{VO}_2$                 | 314.4 | 310   | 1   | 100   | 5         |
|                                            | 50    | 163.5 | 5   | 5000  |           |
| $\text{Na}^+$ doping $\text{VO}_2$         | 397   | 301   | 0.2 | 110   | 6         |
|                                            | 156   | 118   | 12  | 3000  |           |
| $\text{VO}_2@\text{NC}$                    | 269.3 | 268.5 | 10  | 2500  | 7         |
| $\text{VO}_2 \cdot 0.45\text{H}_2\text{O}$ | 200   | 140   | 5   | 3000  | 8         |
| $\beta\text{-VO}_2/\text{CNTs}$            | 205   | 165   | 3   | 5000  | 9         |

### References:

- 1 M. Yang, D. Ma, H. Mi, X. Yang, Y. Wang, L. Sun and P. Zhang, A unique morphology and interface dualengineering strategy enables the holey C@ $\text{VO}_2$  cathode with enhanced storage kinetics for aqueous Zn-ion batteries, *J. Mater. Chem. A* 2021, **9**, 8792-8804.
- 2 X. Dai, F. Wan, L. L. Zhang, H. M. Cao and Z. Q. Niu, Freestanding graphene/ $\text{VO}_2$  composite films for highly stable aqueous Zn-ion batteries with superior rate performance, *Energy Storage Mater.* 2019, **17**, 143-150.
- 3 F. Cui, J. Zhao, D. Zhang, Y. Fang, F. Hu and K. Zhu,  $\text{VO}_2(\text{B})$  nanobelts and reduced graphene oxides composites as cathode materials for low-cost rechargeable aqueous zinc ion batteries, *Chem. Eng. J.* 2020, **390**, 124118.
- 4 T. Y. Wei, Q. Li, G. Z. Yang and C. X. Wang, An electrochemically induced bilayered structure facilitates long-life zinc storage of vanadium dioxide, *J. Mater. Chem. A* 2018, **6**, 8006-8012.



- 5 Y.-Y. Liu, T.-T. Lv, H. Wang, X.-T. Guo, C.-S. Liu and H. Pang, Nsutite-type VO<sub>2</sub> microcrystals as highly durable cathode materials for aqueous zinc-ion batteries, *Chem. Eng. J.* 2021, **417**, 128408.
- 6 Y. Liu and X. Wu, Hydrogen and sodium ions co-intercalated vanadium dioxide electrode materials with enhanced zinc ion storage capacity, *Nano Energy* 2021, **86**, 106124.
- 7 T.-T. Lv, X. Luo, G.-Q. Yuan, S.-Y. Yang and H. Pang, Layered VO<sub>2</sub>@N-doped carbon composites for high-performance rechargeable aqueous zinc-ion batteries, *Chem. Eng. J.* 2022, **428**, 131211.
- 8 K. Zhu, T. Wu, S. Sun, W. van den Bergh, M. Stefik and K. Huang, Synergistic H<sup>+</sup>/Zn<sup>2+</sup> dual ion insertion mechanism in high-capacity and ultra-stable hydrated VO<sub>2</sub> cathode for aqueous Zn-ion batteries, *Energy Storage Mater.* 2020, **29**, 60-70.
- 9 X. Fan, X. Wen, Y. Tang, W. Zhou, K. Xiang and H. Chen, β-VO<sub>2</sub>/carbon nanotubes core-shelled microspheres and their applications for advanced cathode in aqueous zinc ion batteries, *Electrochim. Acta* 2021, **400**, 139425.
